# Supplementary material for: Identification of QTLs affecting scopolin and scopoletin biosynthesis in Arabidopsis thaliana
Source: PubMed Central journal article supplement (PMC4252993; doi:10.1186/s12870-014-0280-9), 2014-10-18
Supplement: 12870_2014_280_MOESM1_ESM.pdf [file 12870_2014_280_MOESM1_ESM.pdf]

## Additional file 1:

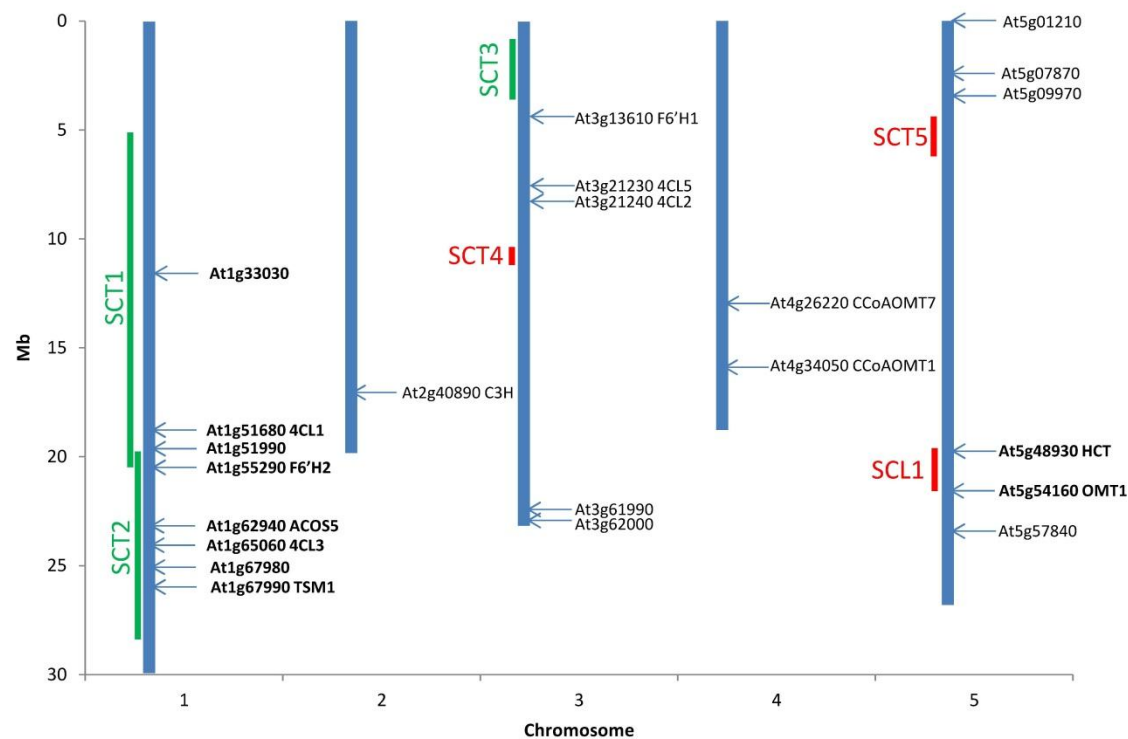

**Figure S1. The position of known loci involved in scopolin and scopoletin biosynthesis.** Mapped QTLs are highlighted in green and red colours. QTLs characterized by the highest LOD score values are highlighted in red. Loci co-localizing with QTLs are highlighted in bold.
