# Supplementary material for: Identification of QTLs affecting scopolin and scopoletin biosynthesis in Arabidopsis thaliana
Source: PubMed Central journal article supplement (PMC4252993; doi:10.1186/s12870-014-0280-9), 2014-10-18
Supplement: 12870_2014_280_MOESM2_ESM.pdf [file 12870_2014_280_MOESM2_ESM.pdf]

## Additional file 2:

```
Kond      ATGTCATCAACAAAGACAATAATGGAAACTATATACCTAATTCTCTCTCTCTTCTTCTTC 60
Ler       ATGTCATCAACAAAGACAATAATGGAAACTATATACCTAATTCTCTCTCTCTTCTTCTTC 60
Est       ATGTCATCAACAAAGACAATAATGGAAACTATATACCTAATTCTCTCTCTCTTCTTCTT- 59
Col-0     ATGTCATCAACAAAGACAATAATGGAAACTATATACCTAATTCTCTCTCTCTTCTTCTTC 60
Est-1     ATGTCATCAACAAAGACAATAATGGAAACTATATACCTAATTCTCTCTCTCTTCTTCTTC 60
Tsu-1     ATGTCATCAACAAAGACAATAATGGAAACTATATACCTAATTCTCTCTCTCTTCTTCTTC 60
An-1      ATGTCATCAACAAAGACAATAATGGAAACTATATACCTAATTCTCTCTCTCTTCTTCTTC 60
Est-1*    ATGTCATCAACAAAGACAATAATGGAAACTATATACCTAATTCTCTCTCTCTTCTTCTTC 60
```

\*\*\*\*\*

```
Kond      TTCATCTTCCTATCTCTCAAACCTCGTGTTCGGGCCACGGCCACGTAAACTAAACCTACCG 120
Ler       TTCATCTTCCTATCTCTCAAACCTCGTGTTCGGGCCACGGCCACGTAAACTAAACCTACCG 120
Est       --CATCTTCCTATCTCTCAAACCTCTTGTTCGGGCCACGGCCCGTAAACTAAACCTACCG 117
Col-0     TTCATCTTCCTATCTCTCAAACCTCTTGTTCGGACCACGGCCCGTAAACTAAACCTACCG 120
Est-1     TTCATCTTCCTATCTCTCAAACCTCTTGTTCGGACCACGGCCCGTAAACTAAACCTACCG 120
Tsu-1     TTCATCTTCCTATCTCTCAAACCTCTTGTTCGGACCACGGCCCGTAAACTAAACCTACCG 120
An-1      TTCATCTTCCTATCTCTCAAACCTCTTGTTCGGACCACGGCCCGTAAACTAAACCTACCG 120
Est-1*    TTCATCTTCCTATCTCTCAAACCTCTTGTTCGGACCACGGCCCGTAAACTAAACCTACCG 120
```

\*\*\*\*\*

```
Kond      CCGAGTCCGAGTCGACCATTTCCGATCATCGGACACCTCCACCTTCTAAAGCTACCACTC 180
Ler       CCGAGTCCGAGTCGACCATTTCCGATCATCGGACACCTCCACCTTCTAAAGCTACCACTC 180
Est       CCTAGTCCGAGTCGACCATTTCCGATCATCGGACACCTCCACCTTCTAAAGCTACCACTC 177
Col-0     CCGAGTCCGAGTCGACCATTTCCGATCATCGGACACCTCCACCTTCTAAAGCTACCACTC 180
Est-1     CCGAGTCCGAGTCGACCATTTCCGATCATCGGACACCTCCACCTTCTAAAGCTACCACTC 180
Tsu-1     CCGAGTCCGAGTCGACCATTTCCGATCATCGGACACCTCCACCTTCTAAAGCTACCACTC 180
An-1      CCGAGTCCGAGTCGACCATTTCCGATCATCGGACACCTCCACCTTCTAAAGCTACCACTC 180
Est-1*    CCGAGTCCGAGTCGACCATTTCCGATCATCGGACACCTCCACCTTCTAAAGCTACCACTC 180
```

\*\* \*\*\*\*\*

Kond CACCGTAGATTTCTCTCTCTCTCAGAATCTTTAAACAACGCCAAGATATTCTCTCTTCGC 240  
Ler CACCGTAGATTTCTCTCTCTCTCAGAATCTTTAAACAACGCCAAGATATTCTCTCTTCGC 240  
Est CACCGTAGATTTCTCTCTCTCTCAGAATCTTTAAACGACGCCAAAATATTCTCTCTTCGC 237  
Col-0 CACCGTAGATTTCTCTCTCTCTCAGAATCTTTAAACAACGCCAAGATTTTCTCTCTCAGC 240  
Est-1 CACCGTAGATTTCTCTCTCTCTCAGAATCTTTAAACAACGCCAAGATTTTCTCTCTCAGC 240  
Tsu-1 CACCGTAGATTTCTCTCTCTCTCAGAATCTTTAAACAACGCCAAGATTTTCTCTCTCAGC 240  
An-1 CACCGTAGATTTCTCTCTCTCTCAGAATCTTTAAACAACGCCAAGATTTTCTCTCTCAGC 240  
Est-1\* CACCGTAGATTTCTCTCTCTCTCAGAATCTTTAAACAACGCCAAGATTTTCTCTCTCAGC 240  
\*\*\*\*\* \*\* \*\*\*\*\* \*\*

Kond CTCGGCTCTCGACTAGTTTTTGTGTTTCTTCAACGCCCGTGGCGGAAGAATGTTTCACT 300  
Ler CTCGGCTCTCGACTAGTTTTTGTGTTTCTTCAACGCCCGTGGCGGAAGAATGTTTCACT 300  
Est CTCGGCTCTCGTCTAGTTTTTGTGTTTCTTCTCACGCCGTCGCTGAAGAATGTTTCACT 297  
Col-0 CTCGGCTCTCGTCTAGTTTTTGTGTTTCTTCTCACGCCGTCGCGGAAGAATGTTTCACT 300  
Est-1 CTCGGCTCTCGTCTAGTTTTTGTGTTTCTTCTCACGCCGTCGCGGAAGAATGTTTCACT 300  
Tsu-1 CTCGGCTCTCGTCTAGTTTTTGTGTTTCTTCTCACGCCGTCGCGGAAGAATGTTTCACT 300  
An-1 CTCGGCTCTCGTCTAGTTTTTGTGTTTCTTCTCACGCCGTCGCGGAAGAATGTTTCACT 300  
Est-1\* CTCGGCTCTCGTCTAGTTTTTGTGTTTCTTCTCACGCCGTCGCGGAAGAATGTTTCACT 300  
\*\*\*\*\* \*\* \*\*\*\*\* \*\*

Kond AAGAACGACGTCGTGTTAGCTAACCGCCGGAGTTTCTCGTCGGGAAACATATAGGGTAC 360  
Ler AAGAACGACGTCGTGTTAGCTAACCGCCGGAGTTTCTCGTCGGGAAACATATAGGGTAC 360  
Est AAGAACGACGTCGTGTTAGCTAACCGCCGGAGTTTCTCGTCGGGAAACATATAGGGTAC 357  
Col-0 AAGAACGACGTCGTGTTAGCTAACCGCCGGAGTTTCTCGTCGGGAAACATATAGGGTAC 360  
Est-1 AAGAACGACGTCGTGTTAGCTAACCGCCGGAGTTTCTCGTCGGGAAACATATAGGGTAC 360  
Tsu-1 AAGAACGACGTCGTGTTAGCTAACCGCCGGAGTTTCTCGTCGGGAAACATATAGGGTAC 360  
An-1 AAGAACGACGTCGTGTTAGCTAACCGCCGGAGTTTCTCGTCGGGAAACATATAGGGTAC 360  
Est-1\* AAGAACGACGTCGTGTTAGCTAACCGCCGGAGTTTCTCGTCGGGAAACATATAGGGTAC 360  
\*\*\*\*\*

Kond AACTCTACGACCATGGTTGGCGCGGCTTAAAGGAGATAGTTGGAGGAATCTTCGACGTATT 420  
Ler AACTCTACGACCATGGTTGGCGCGGCTTAAAGGAGATAGTTGGAGGAATCTTCGACGTATT 420  
Est AACTCTACGACCATGGTTGGCGCGGCTTAAAGGAGATAGTTGGAGGAATCTTCGACGTATT 417  
Col-0 AACTCTACGACCATGGTTGGTGC GGCTTATGGAGATAGTTGGAGGAATCTTCGACGTATT 420  
Est-1 AACTCTACGACCATGGTTGGTGC GGCTTATGGAGATAGTTGGAGGAATCTTCGACGTATT 420  
Tsu-1 AACTCTACGACCATGGTTGGTGC GGCTTATGGAGATAGTTGGAGGAATCTTCGACGTATT 420  
An-1 AACTCTACGACCATGGTTGGTGC GGCTTATGGAGATAGTTGGAGGAATCTTCGACGTATT 420  
Est-1\* AACTCTACGACCATGGTTGGTGC GGCTTATGGAGATAGTTGGAGGAATCTTCGACGTATT 420  
\*\*\*\*\*

Kond GGCACCATTGAGATCTTCTCGTCTCTTAGGCTTAATAGCTTCGTATCTATCCGTCACGAT 480  
Ler GGCACCATTGAGATCTTCTCGTCTCTTAGGCTTAATAGCTTCGTATCTATCCGTCACGAT 480  
Est GGCACCATTGAGATCTTCTCGTCTCTTAGGCTTAATAGCTTCGTATCTATCCGTCACGAT 477  
Col-0 GGCACCATTGAGATCTTCTCGTCTCTTAGGCTTAATAGCTTCGTATCTATCCGTCACGAT 480  
Est-1 GGCACCATTGAGATCTTCTCGTCTCTTAGGCTTAATAGCTTCGTATCTATCCGTCACGAT 480  
Tsu-1 GGCACCATTGAGATCTTCTCGTCTCTTAGGCTTAATAGCTTCGTATCTATCCGTCACGAT 480  
An-1 GGCACCATTGAGATCTTCTCGTCTCTTAGGCTTAATAGCTTCGTATCTATCCGTCACGAT 480  
Est-1\* GGCACCATTGAGATCTTCTCGTCTCTTAGGCTTAATAGCTTCGTATCTATCCGTCACGAT 480  
\*\*\*\*\*

Kond GAGATCCGACGGCTCATAATTTGTCTAGCGAAAACTCTCAACATGGGTTTGTGAAAGTG 540  
Ler GAGATCCGACGGCTCATAATTTGTCTAGCGAAAACTCTCAACATGGGTTTGTGAAAGTG 540  
Est GAGATCCGACGGCTCATAATTTGTCTAGCGAAAACTCTCAACATGGGTTTGTGAAAGTG 537  
Col-0 GAGATCCGACGGCTCATAATTTGTCTAGCGAAAACTCTCAACATGGGTTTGTGAAAGTG 540  
Est-1 GAGATCCGACGGCTCATAATTTGTCTAGCGAAAACTCTCAACATGGGTTTGTGAAAGTG 540  
Tsu-1 GAGATCCGACGGCTCATAATTTGTCTAGCGAAAACTCTCAACATGGGTTTGTGAAAGTG 540  
An-1 GAGATCCGACGGCTCATAATTTGTCTAGCGAAAACTCTCAACATGGGTTTGTGAAAGTG 540  
Est-1\* GAGATCCGACGGCTCATAATTTGTCTAGCGAAAACTCTCAACAAGAGTTTGTGAAAGTG 540  
\*\*\*\*\*

Kond GAGATGAAACCATTGTTTATGTGTTTAACTATCAACAACATCATTAGAATGGTGGCCGGA 600  
Ler GAGATGAAACCATTGTTTATGTGTTTAACTATCAACAACATCATTAGAATGGTGGCCGGA 600  
Est GAGATGAAACCATTGTTTATGTGTTTAACTATCAACAACATCATTAGAATGGTGGCCGGA 597  
Col-0 GAGATGAAACCATTGTTTATGTGTTTAACTATCAACAACATCATTAGAATGGTGGCCGGA 600  
Est-1 GAGATGAAACCATTGTTTATGTGTTTAACTATCAACAACATCATTAGAATGGTGGCCGGA 600  
Tsu-1 GAGATGAAACCATTGTTTATGTGTTTAACTATCAACAACATCATTAGAATGGTGGCCGGA 600  
An-1 GAGATGAAACCATTGTTTATGTGTTTAACTATCAACAACATCATTAGAATGGTGGCCGGA 600  
Est-1\* GAGATGAAACCATTGTTTATGTGTTTAACTATCAACAACATCATTAGAATGGTGGCCGGA 600  
\*\*\*\*\*

Kond AAAAGATTCTACGGTGATGGAACAGAGAACGACAACGAGGCTAAACACGTGAGACAGCTA 660  
Ler AAAAGATTCTACGGTGATGGAACAGAGAACGACAACGAGGCTAAACACGTGAGACAGCTA 660  
Est AAAAGATTCTACGGTGATGGAACAGAGAACGACAACGAGGCTAAACACGTGAGACAGCTA 657  
Col-0 AAAAGATTCTACGGTGATGGAACAGAGAACGACAACGAGGCTAAACACGTGAGACAGCTA 660  
Est-1 AAAAGATTCTACGGTGATGGAACAGAGAACGACAACGAGGCTAAACACGTGAGACAGCTA 660  
Tsu-1 AAAAGATTCTACGGTGATGGAACAGAGAACGACAACGAGGCTAAACACGTGAGACAGCTA 660  
An-1 AAAAGATTCTACGGTGATGGAACAGAGAACGACAACGAGGCTAAACACGTGAGACAGCTA 660  
Est-1\* AAAAGATTCTACGGTGATGGAACAGAGAACGACAACGAGGCAAAACACGTGAGACAGTTG 660  
\*\*\*\*\* \*

Kond ATTGCCGAGGTAGTTGTTAGCGGCGGCGCAGGGAACGCAGCAGACTACTTCCCTATCCTT 720  
Ler ATTGCCGAGGTAGTTGTTAGCGGCGGCGCAGGGAACGCAGCAGACTACTTCCCTATCCTT 720  
Est ATTGCCGAGGTAGTTGTTAGCGGCGGCGCAGGGAACGCAGCAGACTACTTCCCTATCCTT 717  
Col-0 ATTGCCGAGGTAGTTGTTAGCGGCGGCGCAGGGAACGCAGCAGACTACTTCCCTATCCTT 720  
Est-1 ATTGCCGAGGTAGTTGTTAGCGGCGGCGCAGGGAACGCAGCAGACTACTTCCCTATCCTT 720  
Tsu-1 ATTGCCGAGGTAGTTGTTAGCGGCGGCGCAGGGAACGCAGCAGACTACTTCCCTATCCTT 720  
An-1 ATTGCCGAGGTAGTTGTTAGCGGCGGCGCAGGGAACGCAGCAGACTACTTCCCTATCCTT 720  
Est-1\* ATCGCCGAGGTAGTTGTTAGCGGCGGCGCGGGGAACGCAGCAGACTACTTCCCTATCCTT 720  
\*\* \*\*\*\*\* \*

Kond CGTTACGTAACGAACTATGAGAAACATGTTAAGAAGTTAGCAGGTCGTGTTGATGAGTTT 780  
Ler CGTTACGTAACGAACTATGAGAAACATGTTAAGAAGTTAGCAGGTCGTGTTGATGAGTTT 780  
Est CGTTACGTAACGAACTATGAGAAACATGTTAAGAAGTTAGCAGGTCGTGTTGATGAGTTT 777  
Col-0 CGTTACGTAACGAACTATGAGAAACATGTTAAGAAGTTAGCAGGTCGTGTTGATGAGTTT 780  
Est-1 CGTTACGTAACGAACTATGAGAAACATGTTAAGAAGTTAGCAGGTCGTGTTGATGAGTTT 780  
Tsu-1 CGTTACGTAACGAACTATGAGAAACATGTTAAGAAGTTAGCAGGTCGTGTTGATGAGTTT 780  
An-1 CGTTACGTAACGAACTATGAGAAACATGTTAAGAAGTTAGCAGGTCGTGTTGATGAGTTT 780  
Est-1\* CGTTATGTAACGAACTATGAGAAACATGTTAAGAAGTTAGCAGGTCGTGTTGATGAGTTT 780  
\*\*\*\*\*

Kond TTGCAAAGTCTAGTTAACGAGAAACGTGTGGAGAAAGTAAAAGGTAACACAATGATCGAT 840  
Ler TTGCAAAGTCTAGTTAACGAGAAACGTGTGGAGAAAGTAAAAGGTAACACAATGATCGAT 840  
Est TTGCAAAGTCTAGTTAACGAGAAACGTGTGGAGAAAGTAAAAGGTAACACAATGATCGAT 837  
Col-0 TTGCAAAGTCTAGTTAACGAGAAACGTGTGGAGAAAGTAAAAGGTAACACAATGATCGAT 840  
Est-1 TTGCAAAGTCTAGTTAACGAGAAACGTGTGGAGAAAGTAAAAGGTAACACAATGATCGAT 840  
Tsu-1 TTGCAAAGTCTAGTTAACGAGAAACGTGTGGAGAAAGTAAAAGGTAACACAATGATCGAT 840  
An-1 TTGCAAAGTCTAGTTAACGAGAAACGTGTGGAGAAAGTAAAAGGTAACACAATGATCGAT 840  
Est-1\* TTGCAAAGTCTAGTTAACGAGAAACGTGAGGAGAAAGTAAAAGGTAACACAATGATCGAT 840  
\*\*\*\*\*

Kond CATTACTTTCTCTACAAGAAACTCAGCCTGATTACTACACGGATGTGATCATCAAAGGA 900  
Ler CATTACTTTCTCTACAAGAAACTCAGCCTGATTACTACACGGATGTGATCATCAAAGGA 900  
Est CATTACTTTCTCTACAAGAAACTCAGCCTGATTACTACACGGATGTGATCATCAAAGGA 897  
Col-0 CATTACTTTCTCTACAAGAAACTCAGCCTGATTACTACACGGATGTGATCATCAAAGGA 900  
Est-1 CATTACTTTCTCTACAAGAAACTCAGCCTGATTACTACACGGATGTGATCATCAAAGGA 900  
Tsu-1 CATTACTTTCTCTACAAGAAACTCAGCCTGATTACTACACGGATGTGATCATCAAAGGA 900  
An-1 CATTACTTTCTCTACAAGAAACTCAGCCTGATTACTACACGGATGTGATCATCAAAGGA 900  
Est-1\* CATTACTTTCTCTACAAGAAACTCAGCCTGATTACTACACTGATGTGATCATCAAAGGA 900  
\*\*\*\*\*

Kond ATCATACTTGTATGATACTTGCCGGGACTGATACATCAGCTGGAACGTTAGAATGGGCG 960  
Ler ATCATACTTGTATGATACTTGCCGGGACTGATACATCAGCTGGAACGTTAGAATGGGCG 960  
Est ATCATACTTGTATGATACTTGCCGGGACTGATACATCAGCTGGAACGTTAGAATGGGCG 957  
Col-0 ATCATACTTGTATGATACTTGCCGGGACTGATACATCAGCTGGAACGTTAGAATGGGCG 960  
Est-1 ATCATACTTGTATGATACTTGCCGGGACTGATACATCAGCTGGAACGTTAGAATGGGCG 960  
Tsu-1 ATCATACTTGTATGATACTTGCCGGGACTGATACATCAGCTGGAACGTTAGAATGGGCG 960  
An-1 ATCATACTTGTATGATACTTGCCGGGACTGATACATCAGCTGGAACGTTAGAATGGGCG 960  
Est-1\* ATCATACTTGTATGATACTTGCCGGGACTGATACATCAGCTGGAACGTTAGAATGGGCG 960  
\*\*\*\*\*

Kond ATGTCGAATTTGTTGAACCATCCAGAAGTATTACGAAAGGCAAAGACCGAAATCGACGAC 1020  
Ler ATGTCGAATTTGTTGAACCATCCAGAAGTATTACGAAAGGCAAAGACCGAAATCGACGAC 1020  
Est ATGTCGAATTTGTTGAACCATCCAGAAGTATTACGAAAGGCAAAGACCGAAATCGACGAC 1017  
Col-0 ATGTCGAATTTGTTGAACCATCCAGAAGTATTACGAAAGGCAAAGACCGAAATCGACGAC 1020  
Est-1 ATGTCGAATTTGTTGAACCATCCAGAAGTATTACGAAAGGCAAAGACCGAAATCGACGAC 1020  
Tsu-1 ATGTCGAATTTGTTGAACCATCCAGAAGTATTACGAAAGGCAAAGACCGAAATCGACGAC 1020  
An-1 ATGTCGAATTTGTTGAACCATCCAGAAGTATTACGAAAGGCAAAGACCGAAATCGACGAC 1020  
Est-1\* ATGTCGAATTTGTTGAACCATCCAGAAGTATTACGAAAGGCAAAGACCGAAATCGACGAC 1020  
\*\*\*\*\*

Kond CAAATCGGTGTAGACCGGTTAGTAGAGGAACAAGACATTGTGAAACTTCCTTACCTTCAG 1080  
Ler CAAATCGGTGTAGACCGGTTAGTAGAGGAACAAGACATTGTGAAACTTCCTTACCTTCAG 1080  
Est CAAATCGGTGTAGACCGGTTAGTAGAGGAACAAGACATTGTGAAACTTCCTTACCTTCAG 1077  
Col-0 CAAATCGGTGTAGACCGGTTAGTAGAGGAACAAGACATTGTGAAACTTCCTTACCTTCAG 1080  
Est-1 CAAATCGGTGTAGACCGGTTAGTAGAGGAACAAGACATTGTGAAACTTCCTTACCTTCAG 1080  
Tsu-1 CAAATCGGTGTAGACCGGTTAGTAGAGGAACAAGACATTGTGAAACTTCCTTACCTTCAG 1080  
An-1 CAAATCGGTGTAGACCGGTTAGTAGAGGAACAAGACATTGTGAAACTTCCTTACCTTCAG 1080  
Est-1\* CAAATCGGTGTAGACCGGTTAATAGAGGAACAAGACATTGTGAAACTTCCTTACCTTCAG 1080  
\*\*\*\*\*

Kond CACATTGTGTCAGAGACTTTACGGCTTTATCCGGTGGCTCCAATGCTTTTACCCACTTA 1140  
Ler CACATTGTGTCAGAGACTTTACGGCTTTATCCGGTGGCTCCAATGCTTTTACCCACTTA 1140  
Est CACATTGTGTCAGAGACTTTACGGCTTTATCCGGTGGCTCCAATGCTTTTACCCACTTA 1137  
Col-0 CACATTGTGTCAGAGACTTTACGGCTTTATCCGGTGGCTCCAATGCTTTTACCCACTTA 1140  
Est-1 CACATTGTGTCAGAGACTTTACGGCTTTATCCGGTGGCTCCAATGCTTTTACCCACTTA 1140  
Tsu-1 CACATTGTGTCAGAGACTTTACGGCTTTATCCGGTGGCTCCAATGCTTTTACCCACTTA 1140  
An-1 CACATTGTGTCAGAGACTTTACGGCTTTATCCGGTGGCTCCAATGCTTTTACCCACTTA 1140  
Est-1\* CACATTGTGTCAGAGACTTTACGGCTTTATCCAGTGGCTCCAATGCTTTTACCCACTTA 1140  
\*\*\*\*\*

Kond GCATCAGAAGATTGTATAGTTGATGGCTATGACGTTCCACGCGGCACAATCATCTTGGTG 1200  
Ler GCATCAGAAGATTGTATAGTTGATGGCTATGACGTTCCACGCGGCACAATCATCTTGGTG 1200  
Est GCATCAGAAGATTGTATAGTTGATGGCTATGACGTTCCACGCGGCACAATCATCTTGGTG 1197  
Col-0 GCATCAGAAGATTGTATAGTTGATGGCTATGACGTTCCACGCGGCACAATCATCTTGGTG 1200  
Est-1 GCATCAGAAGATTGTATAGTTGATGGCTATGACGTTCCACGCGGCACAATCATCTTGGTG 1200  
Tsu-1 GCATCAGAAGATTGTATAGTTGATGGCTATGACGTTCCACGCGGCACAATCATCTTGGTG 1200  
An-1 GCATCAGAAGATTGTATAGTTGATGGCTATGACGTTCCACGCGGCACAATCATCTTGGTG 1200  
Est-1\* GCATCAGAAAATTGTGTAGTTGATGGCTATGACGTTCCACAAGGCACAATCATCTTGGTG 1200  
\*\*\*\*\*

Kond AATGCATGGGCCATCCATAGAGATCCAAAGTTATGGGAAGAGCCAGAAAAATTTAAGCCG 1260  
Ler AATGCATGGGCCATCCATAGAGATCCAAAGTTATGGGAAGAGCCAGAAAAATTTAAGCCG 1260  
Est AATGCATGGGCCATCCATAGAGATCCAAAGTTATGGGAAGAGCCAGAAAAATTTAAGCCG 1257  
Col-0 AATGCATGGGCCATCCATAGAGATCCAAAGTTATGGGAAGAGCCAGAAAAATTTAAGCCG 1260  
Est-1 AATGCATGGGCCATCCATAGAGATCCAAAGTTATGGGAAGAGCCAGAAAAATTTAAGCCG 1260  
Tsu-1 AATGCATGGGCCATCCATAGAGATCCAAAGTTATGGGAAGAGCCAGAAAAATTTAAGCCG 1260  
An-1 AATGCATGGGCCATCCATAGAGATCCAAAGTTATGGGAAGAGCCAGAAAAATTTAAGCCG 1260  
Est-1\* AATGCATGGGCCATCCATAGAGATCCAAAGTTATGGGAAGAGCCAGAAAAATTTAAGCCG 1260  
\*\*\*\*\*

Kond GAGAGGTTT GAGAAAAA AGGAGAGGATAAAAA GTTGATGCCA TTTGGGATTGGACGACGA 1320  
Ler GAGAGGTTT GAGAAAAA AGGAGAGGATAAAAA GTTGATGCCA TTTGGGATTGGACGACGA 1320  
Est GAGAGGTTT GAGAAAAA AGGAGAGGATAAAAA GTTGATGCCA TTTGGGATTGGACGACGA 1317  
Col-0 GAGAGGTTT GAGAAAAA AGGAGAGGATAAAAA GTTGATGCCA TTTGGGATTGGACGACGA 1320  
Est-1 GAGAGGTTT GAGAAAAA AGGAGAGGATAAAAA GTTGATGCCA TTTGGGATTGGACGACGA 1320  
Tsu-1 GAGAGGTTT GAGAAAAA AGGAGAGGATAAAAA GTTGATGCCA TTTGGGATTGGACGACGA 1320  
An-1 GAGAGGTTT GAGAAAAA AGGAGAGGATAAAAA GTTGATGCCA TTTGGGATTGGACGACGA 1320  
Est-1\* GAGAGGTTT GAGAAAAA AGGAGAGGATAAAAA GTTGATGCCA TTTGGGATTGGACGACGA 1320  
\*\*\*\*\*

Kond TCTTGCCCTGGTTCAGGGCTAGCTCAACGGCTAGTGACTTTGGCTCTTGGATCATTGGTC 1380  
Ler TCTTGCCCTGGTTCAGGGCTAGCTCAACGGCTAGTGACTTTGGCTCTTGGATCATTGGTC 1380  
Est TCTTGCCCTGGTTCAGGGCTAGCTCAACGGCTAGTGACTTTGGCTCTTGGATCATTGGTC 1377  
Col-0 TCTTGCCCTGGTTCAGGGCTAGCTCAACGGCTAGTGACTTTGGCTCTTGGATCATTGGTC 1380  
Est-1 TCTTGCCCTGGTTCAGGGCTAGCTCAACGGCTAGTGACTTTGGCTCTTGGATCATTGGTC 1380  
Tsu-1 TCTTGCCCTGGTTCAGGGCTAGCTCAACGGCTAGTGACTTTGGCTCTTGGATCATTGGTC 1380  
An-1 TCTTGCCCTGGTTCAGGGCTAGCTCAACGGCTAGTGACTTTGGCTCTTGGATCATTGGTC 1380  
Est-1\* TCTTGCCCTGGTTCAGGGCTAGCTCAACGGCTAGTGACTTTGGCTCTTGGATCATTGGTC 1380  
\*\*\*\*\*

Kond CAATGTTTTGAGTGGGAGAGGGTTGAAGAAAAGTATCTAGACATGAGAGAAAGTGAAAAA 1440  
Ler CAATGTTTTGAGTGGGAGAGGGTTGAAGAAAAGTATCTAGACATGAGAGAAAGTGAAAAA 1440  
Est CAATGTTTTGAGTGGGAGAGGGTTGAAGAAAAGTATCTAGACATGAGAGAAAGTGAAAAA 1437  
Col-0 CAATGTTTTGAGTGGGAGAGGGTTGAAGAAAAGTATCTAGACATGAGAGAAAGTGAAAAA 1440  
Est-1 CAATGTTTTGAGTGGGAGAGGGTTGAAGAAAAGTATCTAGACATGAGAGAAAGTGAAAAA 1440  
Tsu-1 CAATGTTTTGAGTGGGAGAGGGTTGAAGAAAAGTATCTAGACATGAGAGAAAGTGAAAAA 1440  
An-1 CAATGTTTTGAGTGGGAGAGGGTTGAAGAAAAGTATCTAGACATGAGAGAAAGTGAAAAA 1440  
Est-1\* CAATGTTTTGAGTGGGAGAGGGTTGAAGAAAAGTATCTAGACATGAGAGAAAGTGAAAAA 1440  
\*\*\*\*\*



```

Kond      GGAACCACAATGCGAAAAGCTACATCGTTGCAAGCTATGTGTAAAGCTCGTCCCATTGTC 1500
Ler       GGAACCACAATGCGAAAAGCTACATCGTTGCAAGCTATGTGTAAAGCTCGTCCCATTGTC 1500
Est       GGAACCACAATGCGAAAAGCTACATCGTTGCAAGCTATGTGTAAAGCTCGTCCCATTGTC 1497
Col-0    GGAACCACAATGCGAAAAGCTACATCGTTGCAAGCTATGTGTAAAGCTCGTCCCATTGTC 1500
Est-1    GGAACCACAATGCGAAAAGCTACATCGTTGCAAGCTATGTGTAAAGCTCGTCCCATTGTC 1500
Tsu-1    GGAACCACAATGCGAAAAGCTACATCGTTGCAAGCTATGTGTAAAGCTCGTCCCATTGTC 1500
An-1     GGAACCACAATGCGAAAAGCTACATCGTTGCAAGCTATGTGTAAAGCTCGTCCCATTGTC 1500
Est-1*   GGAACCACGATGCGCAAAGCTACATCGTTGCAAGCTATGTGTAAAGCTCGTCCCATTGTC 1500
          *****
Kond      CATAAGGTTTTAGATGCTTCTTGTCATAA 1530
Ler       CATAAGGTTTTAGATGCTTCTTGTCATAA 1530
Est       CATAAGGTTTTAGATGCTTCTTGTCATAA 1527
Col-0    CATAAGGTTTTAGATGCTTCTTGTCATAA 1530
Est-1    CATAAGGTTTTAGATGCTTCTTGTCATAA 1530
Tsu-1    CATAAGGTTTTAGATGCTTCTTGTCATAA 1530
An-1     CATAAGGTTTTAGATGCTTCTTGTCATAA 1530
Est-1*   CATAAGGTTTTAGATGCTTCTTGTCATAA 1530
          *****

```

**Figure S2. Multiple Sequence Alignment of coding sequences of *AtCYP81D11* gene produced by CLUSTALW.** The following sequences were taken from the 1001 Genomes Project database ([www.1001genomes.org](http://www.1001genomes.org)): Kond, *Ler*, Est, Col-0, Est-1, Tsu-1, An-1 (Kas-2 sequence was not available in the database). The selected sequences originate from accessions, which were used in the initial screening of natural variation in scopolin and scopoletin accumulation. The Est-1\* sequence was obtained after re-sequencing of Est-1 accession from our laboratory.
