# Supplementary material for: Identification of QTLs affecting scopolin and scopoletin biosynthesis in Arabidopsis thaliana
Source: PubMed Central journal article supplement (PMC4252993; doi:10.1186/s12870-014-0280-9), 2014-10-18
Supplement: 12870_2014_280_MOESM3_ESM.pdf [file 12870_2014_280_MOESM3_ESM.pdf]

### Additional file 3:

```
Col-0      ATGGGCCAAAATTTTCACGCTTTTATGTTCCCATGGTTCGCTTTTGGTCATATGACTCCA 60
Est        ATGGGCCAAAATTTTCACGCTTTTATGTTCCCATGGTTCGCTTTTGGTCATATGACTCCA 60
Kond       ATGGGCCAAAATTTTCACGCTTTTATGTTCCCATGGTTCGCTTTTGGTCATATGACTCCA 60
Tsu-1     ATGGGCCAAAATTTTCACGCTTTTATGTTCCCATGGTTCGCTTTTGGTCATATGACTCCA 60
An-1      ATGGGCCAAACGTTTCACGCTTTTATGTTCCCATGGTTCGCTTTTGGTCATATGACTCCA 60
Ler       ATGGGCCAAACGTTTCACGCTTTTATGTTCCCATGGTTCGCTTTTGGTCATATGACTCCA 60
Est-1*    ATGGGCCAAAATTTTCACGCTTTTATGTTCCCATGGTTCGCTTTTGGTCATATGACTCCA 60
Est-1     ATGGGCCAAACGTTTCACGCTTTTATGTTCCCATGGTTCGCTTTTGGTCATATGACTCCA 60
```

\*\*\*\*\*

```
Col-0      TACTTGCATCTAGCCAACAAGCTAGCTGCTAAAGGTCATAGGGTTACTTTCTTGCTGCCT 120
Est        TACTTGCATCTAGCCAACAAGCTAGCTGCTAAAGGTCATAGGGTTACTTTCTTGCTGCCT 120
Kond       TACTTGCATCTAGCCAACAAGCTAGCTGCTAAAGGTCATAGGGTTACTTTCTTGCTGCCT 120
Tsu-1     TACTTGCATCTAGCCAACAAGCTAGCTGCTAAAGGTCATAGGGTTACTTTCTTGCTGCCT 120
An-1      TACTTGCATCTAGCCAACAAGCTAGCTGCTAAAGGTCATAGGGTTACTTTCTTGCTGCCT 120
Ler       TACTTGCATCTAGCCAACAAGCTAGCTGCTAAAGGTCATAGGGTTACTTTCTTGCTGCCT 120
Est-1*    TACTTGCATCTAGCCAACAAGCTAGCTGCTAAAGGTCATAGGGTTACTTTCTTGCTGCCT 120
Est-1     TACTTGCATCTAGCCAACAAGCTAGCTGCTAAAGGTCATAGGGTTACTTTCTTGCTGCCT 120
```

\*\*\*\*\*

```
Col-0      AAGAAAGCTCAAAAACAGTTGGAACATCACAATCTGTTTCCAGACAGGATCATCTTTCAT 180
Est        AAGAAAGCTCAAAAACAGTTGGAACATCACAATCTGTTTCCAGACAGGATCATCTTTCAT 180
Kond       AAGAAAGCTCAAAAACAGTTGGAACATCACAATCTGTTTCCAGACAGGATCATCTTTCAT 180
Tsu-1     AAGAAAGCTCAAAAACAGTTGGAACATCACAATCTGTTTCCAGACAGGATCATCTTTCAT 180
An-1      AAGAAAGCTCAAAAACAGTTGGAACATCACAATCTGTTTCCAGACAGGATCATCTTTCAT 180
Ler       AAGAAAGCTCAAAAACAGTTGGAACATCACAATCTGTTTCCAGACAGGATCATCTTTCAT 180
Est-1*    AAGAAAGCTCAAAAACAGTTGGAACATCACAATCTGTTTCCAGACAGGATCATCTTTCAT 180
Est-1     AAGAAAGCTCAAAAACAGTTGGAACATCACAATCTGTTTCCAGACAGGATCATCTTTCAT 180
```

\*\*\*\*\*

Col-0 TCTCTTACTATTCCCATGTTGATGGCCTACCTGCTGGCGCGGAGACCGCCTCGGACATC 240  
Est TCTCTTACTATTCCCATGTTGATGGCCTACCTGCTGGCGCGGAGACCGCCTCGGACATC 240  
Kond TCTCTTACTATTCCCATGTTGATGGCCTACCTGCTGGCGCGGAGACCGCCTCGGACATC 240  
Tsu-1 TCTCTTACTATTCCCATGTTGATGGCCTACCTGCTGGCGCGGAGACCGCCTCGGACATC 240  
An-1 CCTCTTACTATTCCCATGTTGATGGCCTACCTGCTGGCGCGGAGACCGCCTCGGACATC 240  
Ler CCTCTTACTATTCCCATGTTGATGGCCTACCTGCTGGCGCGGAGACCGCCTCGGACATC 240  
Est-1\* CCTCTTACTATTCCCATGTTGATGGCCTACCTGCTGGCGCGGAGACCGCCTCGGACATC 240  
Est-1 CCTCTTACTATTCCCATGTTGATGGCCTACCTGCTGGCGCGGAGACCGCCTCGGACATC 240  
\*\*\*\*\*

Col-0 CCCATCTCGTTGGGGAAGTTTCTTACCGCAGCCATGGATCTCACTCGCGATCAGGTCGAA 300  
Est CCCATCTCGTTGGGGAAGTTTCTTACCGCAGCCATGGATCTCACTCGCGATCAGGTCGAA 300  
Kond CCCATCTCGTTGGGGAAGTTTCTTACCGCAGCCATGGATCTCACTCGCGATCAGGTCGAA 300  
Tsu-1 CCCATCTCGTTGGGGAAGTTTCTTACCGCAGCCATGGATCTCACTCGCGATCAGGTCGAA 300  
An-1 CCCATCTCGTTGGGGAAGTTTCTTACCGCAGCCATGGATCTCACTCGCGATCAGGTCGAA 300  
Ler CCCATCTCGTTGGGGAAGTTTCTTACCGCAGCCATGGATCTCACTCGCGATCAGGTCGAA 300  
Est-1\* CCCATCTCGTTGGGGAAGTTTCTTACCGCAGCCATGGATCTCACTCGCGATCAGGTCGAA 300  
Est-1 CCCATCTCGTTGGGGAAGTTTCTTACCGCAGCCATGGATCTCACTCGCGATCAGGTCGAA 300  
\*\*\*\*\*

Col-0 GCCGCGGTTTCGTGCTTTGAGACCAGACCTGATCTTTTTTCGATACTGCTTATTGGGTCCG 360  
Est GCCGCGGTTTCGTGCTTTGAGACCAGACCTGATCTTTTTTCGATACTGCTTATTGGGTCCG 360  
Kond GCCGCGGTTTCGTGCTTTGAGACCAGACCTGATCTTTTTTCGATACTGCTTATTGGGTCCG 360  
Tsu-1 GCCGCGGTTTCGTGCTTTGAGACCAGACCTGATCTTTTTTCGATACTGCTTATTGGGTCCG 360  
An-1 GCCGCGGTTTCGTGCTTTGAGACCAGACCTGATCTTTTTTCGATACTGCTTATTGGGTCCG 360  
Ler GCCGCGGTTTCGTGCTTTGAGACCAGACCTGATCTTTTTTCGATACTGCTTATTGGGTCCG 360  
Est-1\* GCCGCGGTTTCGTGCTTTGAGACCAGACCTGATCTTTTTTCGATACTGCTTATTGGGTCCG 360  
Est-1 GCCGCGGTTTCGTGCTTTGAGACCAGACCTGATCTTTTTTCGATACTGCTTATTGGGTCCG 360  
\*\*\*\*\*

Col-0 GAAATGGCGAAAAGAACACAGAGTCAAGAGTGTGATATACTTTGTGATATCAGCTAACTCC 420  
Est GAAATGGCGAAAAGAACACAGAGTCAAGAGTGTGATATACTTTGTGATATCAGCTAACTCC 420  
Kond GAAATGGCGAAAAGAACACAGAGTCAAGAGTGTGATATACTTTGTGATATCAGCTAACTCC 420  
Tsu-1 GAAATGGCGAAAAGAACACAGAGTCAAGAGTGTGATATACTTTGTGATATCAGCTAACTCC 420  
An-1 GAAATGGCGAAAAGAACATAGAGTCAAGAGTGTGATGTACTTCGTGATATCAGCTAACTCC 420  
Ler GAAATGGCGAAAAGAACATAGAGTCAAGAGTGTGATGTACTTCGTGATATCAGCTAACTCC 420  
Est-1\* GAAATGGCGAAAAGAACATAGAGTCAAGAGTGTGATGTACTTCGTGATATCAGCTAACTCC 420  
Est-1 GAAATGGCGAAAAGAACATAGAGTCAAGAGTGTGATGTACTTCGTGATATCAGCTAACTCC 420  
\*\*\*\*\*

Col-0 ATAGCTCATGAACTTGTACCAGGTGGTGAATTAGGAGTTCCTCCACCTGGCTATCCTTCG 480  
Est ATAGCTCATGAACTTGTACCAGGTGGTGAATTAGGAGTTCCTCCACCTGGCTATCCTTCG 480  
Kond ATAGCTCATGAACTTGTACCAGGTGGTGAATTAGGAGTTCCTCCACCTGGCTATCCTTCG 480  
Tsu-1 ATAGCTCATGAACTTGTACCAGGTGGTGAATTAGGAGTTCCTCCACCTGGCTATCCTTCG 480  
An-1 ATAGCTCATGAACTTGTACCAGGTGGTGAATTAGGAGTTCCTCCACCTGGCTATCCTTCG 480  
Ler ATAGCTCATGAACTTGTACCAGGTGGTGAATTAGGAGTTCCTCCACCTGGCTATCCTTCG 480  
Est-1\* ATAGCTCATGAACTTGTACCAGGTGGTGAATTAGGAGTTCCTCCACCTGGCTATCCTTCG 480  
Est-1 ATAGCTCATGAACTTGTACCAGGTGGTGAATTAGGAGTTCCTCCACCTGGCTATCCTTCG 480  
\*\*\*\*\*

Col-0 TCAAAGTGTGTACCGTGGACACGATGCTCACGCTTTGTTGACTTTTTCCATCCTTCTAC 540  
Est TCAAAGTGTGTACCGTGGACACGATGCTCACGCTTTGTTGACTTTTTCCATCCTTCTAC 540  
Kond TCAAAGTGTGTACCGTGGACACGATGCTCACGCTTTGTTGACTTTTTCCATCCTTCTAC 540  
Tsu-1 TCAAAGTGTGTACCGTGGACACGATGCTCACGCTTTGTTGACTTTTTCCATCCTTCTAC 540  
An-1 TCAAAGTGTGTACCGTGGACACGATGCTCACGCTTTGTTGACTTTTTCCATCCTTCTAC 540  
Ler TCAAAGTGTGTACCGTGGACACGATGCTCACGCTTTGTTGACTTTTTCCATCCTTCTAC 540  
Est-1\* TCAAAGTGTGTACCGTGGACACGATGCTCACGCTTTGTTGACTTTTTCCATGTTCTAC 540  
Est-1 TCAAAGTGTGTACCGTGGACACGATGCTCACGCTTTGTTGACTTTTTCCATCCTTCTAC 540  
\*\*\*\*\*

Col-0 GAGAGGCTTCATTACCGGATAACAACAGGTCTAAAGAATTGTGATTTTATCTCAATTAGG 600  
Est GAGAGGCTTCATTACCGGATAACAACAGGTCTAAAGAATTGTGATTTTATCTCAATTAGG 600  
Kond GAGAGGCTTCATTACCGGATAACAACAGGTCTAAAGAATTGTGATTTTATCTCAATTAGG 600  
Tsu-1 GAGAGGCTTCATTACCGGATAACAACAGGTCTAAAGAATTGTGATTTTATCTCAATTAGG 600  
An-1 GAGAGGCTTCATCACCGGATAACAACAGGTCTAAAGAATTGTGATTTTATCTCTATTAGG 600  
Ler GAGAGGCTTCATCACCGGATAACAACAGGTCTAAAGAATTGTGATTTTATCTCTATTAGG 600  
Est-1\* GAGAGGCTTCATCACCGGATAACAACAGGTCTAAAGAATTGTGATTTTATCTCTATTAGG 600  
Est-1 GAGAGGCTTCATCACCGGATAACAACAGGTCTAAAGAATTGTGATTTTATCTCTATTAGG 600  
\*\*\*\*\*

Col-0 ACTTGTAAGAAATCGAAGGTAAATTCTGCGACTATATAGAGCGTCAATACCAGAGGAAG 660  
Est ACTTGTAAGAAATCGAAGGTAAATTCTGCGACTATATAGAGCGTCAATACCAGAGGAAG 660  
Kond ACTTGTAAGAAATCGAAGGTAAATTCTGCGACTATATAGAGCGTCAATACCAGAGGAAG 660  
Tsu-1 ACTTGTAAGAAATCGAAGGTAAATTCTGCGACTATATAGAGCGTCAATACCAGAGGAAG 660  
An-1 ACTTGTAAGAAATCGAAGGTAAATTCTGCGACTATATAGAGCGTCAATACCAGAGGAAG 660  
Ler ACTTGTAAGAAATCGAAGGTAAATTCTGCGACTATATAGAGCGTCAATACCAGAGGAAG 660  
Est-1\* ACTTGTAAGAAATCGAAGGTAAATTCTGCGACTATATAGAGCGTCAATACCAGAGGAAG 660  
Est-1 ACTTGTAAGAAATCGAAGGTAAATTCTGCGACTATATAGAGCGTCAATACCAGAGGAAG 660  
\*\*\*\*\*

Col-0 GTTCTTTTGACAGGTCCAATGCTTCCAGAGCCAGATAACAGTAGACCACTCGAAGATCGA 720  
Est GTTCTTTTGACAGGTCCAATGCTTCCAGAGCCAGATAACAGTAGACCACTCGAAGATCGA 720  
Kond GTTCTTTTGACAGGTCCAATGCTTCCAGAGCCAGATAACAGTAGACCACTCGAAGATCGA 720  
Tsu-1 GTTCTTTTGACAGGTCCAATGCTTCCAGAGCCAGATAACAGTAGACCACTCGAAGATCGA 720  
An-1 GTTCTTTTGACAGGTCCAATGCTTCCAGAGCCAGACAATAGTAGACCACTCGAAGATCGA 720  
Ler GTTCTTTTGACAGGTCCAATGCTTCCAGAGCCAGACAATAGTAGACCACTCGAAGATCGA 720  
Est-1\* GTTCTTTTGACAGGTCCAATGCTTCCAGAGCCAGACAATAGTAGACCACTCGAAGATCGA 720  
Est-1 GTTCTTTTGACAGGTCCAATGCTTCCAGAGCCAGACAATAGTAGACCACTCGAAGATCGA 720  
\*\*\*\*\*

Col-0 TGGAAATCACTGGCTGAATCAGTTCAAACCCGGCTCGGTAATATATTGTGCATTGGGAAGT 780  
Est TGGAAATCACTGGCTGAATCAGTTCAAACCCGGCTCGGTAATATATTGTGCATTGGGAAGT 780  
Kond TGGAAATCACTGGCTGAATCAGTTCAAACCCGGCTCGGTAATATATTGTGCATTGGGAAGT 780  
Tsu-1 TGGAAATCACTGGCTGAATCAGTTCAAACCCGGCTCGGTAATATATTGTGCATTGGGAAGT 780  
An-1 TGGAAATCACTGGCTGAATCAGTTCAAACCCGGCTCGGTAATATATTGTGCATTGGGAAGT 780  
Ler TGGAAATCACTGGCTGAATCAGTTCAAACCCGGCTCGGTAATATATTGTGCATTGGGAAGT 780  
Est-1\* TGGAAATCACTGGCTGAATCAGTTCAAACCCGGCTCGGTAATATATTGTGCATTGGGAAGT 780  
Est-1 TGGAAATCACTGGCTGAATCAGTTCAAACCCGGCTCGGTAATATATTGTGCATTGGGAAGT 780

\*\*\*\*\*

Col-0 CAAATCACTCTAGAGAAGGATCAATTC AAGA AACTCTGTTTAGGAATGGAGCTCACTGGT 840  
Est CAAATCACTCTAGAGAAGGATCAATTC AAGA AACTCTGTTTAGGAATGGAGCTCACTGGT 840  
Kond CAAATCACTCTAGAGAAGGATCAATTC AAGA AACTCTGTTTAGGAATGGAGCTCACTGGT 840  
Tsu-1 CAAATCACTCTAGAGAAGGATCAATTC AAGA AACTCTGTTTAGGAATGGAGCTCACTGGT 840  
An-1 CAAATAACTCTAGAGAAGGATCAATTC AAGA AACTCTGTTTAGGAATGGAGCTTACTAGT 840  
Ler CAAATAACTCTAGAGAAGGATCAATTC AAGA AACTCTGTTTAGGAATGGAGCTTACTAGT 840  
Est-1\* CAAATAACTCTAGAGAAGGATCAATTC AAGA AACTCTGTTTAGGAATGGAGCTTACTAGT 840  
Est-1 CAAATAACTCTAGAGAAGGATCAATTC AAGA AACTCTGTTTAGGAATGGAGCTTACTAGT 840

\*\*\*\*\* \*\* \*\*

Col-0 TTACCGTTTCTCGTAGCGGTAAAACCACCAAAGGGCGCAAAGACGATCCAAGAAGCGTTG 900  
Est TTACCGTTTCTCGTAGCGGTAAAACCACCAAAGGGCGCAAAGACGATCCAAGAAGCGTTG 900  
Kond TTACCGTTTCTCGTAGCGGTAAAACCACCAAAGGGCGCAAAGACGATCCAAGAAGCGTTG 900  
Tsu-1 TTACCGTTTCTCGTAGCGGTAAAACCACCAAAGGGCGCAAAGACGATCCAAGAAGCGTTG 900  
An-1 TTACCGTTTCTTGTAGCGGTAAAACCACCAAAGGGCGCAAAGACGATCCAAGAAGCGTTG 900  
Ler TTACCGTTTCTTGTAGCGGTAAAACCACCAAAGGGCGCAAAGACGATCCAAGAAGCGTTG 900  
Est-1\* TTACCGTTTCTTGTAGCGGTAAAACCACCAAAGGGCGCAAAGACGATCCAAGAAGCGTTG 900  
Est-1 TTACCGTTTCTTGTAGCGGTAAAACCACCAAAGGGCGCAAAGACGATCCAAGAAGCGTTG 900

\*\*\*\*\*

Col-0 CCAGAAGGGTTTGAGGAGAGGGTGAAGAATCATGGAGTAGTTTGGGGAGAATGGGTGCAG 960  
Est CCAGAAGGGTTTGAGGAGAGGGTGAAGAATCATGGAGTAGTTTGGGGAGAATGGGTGCAG 960  
Kond CCAGAAGGGTTTGAGGAGAGGGTGAAGAATCATGGAGTAGTTTGGGGAGAATGGGTGCAG 960  
Tsu-1 CCAGAAGGGTTTGAGGAGAGGGTGAAGAATCATGGAGTAGTTTGGGGAGAATGGGTGCAG 960  
An-1 CCAGAAGGGTTTGAAGAGAGGGTGAAGAATCATGGAGTAGTTTGGGGAGAATGGGTGCAG 960  
Ler CCAGAAGGGTTTGAAGAGAGGGTGAAGAATCATGGAGTAGTTTGGGGAGAATGGGTGCAG 960  
Est-1\* CCAGAAGGGTTTGAAGAGAGGGTGAAGAATCATGGAGTAGTTTGGGGAGAATGGGTGCAG 960  
Est-1 CCAGAAGGGTTTGAGGAGAGGGTGAAGAATCATGGAGTAGTTTGGGGAGAATGGGTGCAG 960  
\*\*\*\*\*

Col-0 CAACCATTGATATTGGCTCATCCATCAGTAGGCTGCTTTGTGACCCATTGTGGGTTTGGGA 1020  
Est CAACCATTGATATTGGCTCATCCATCAGTAGGCTGCTTTGTGACCCATTGTGGGTTTGGGA 1020  
Kond CAACCATTGATATTGGCTCATCCATCAGTAGGCTGCTTTGTGACCCATTGTGGGTTTGGGA 1020  
Tsu-1 CAACCATTGATATTGGCTCATCCATCAGTAGGCTGCTTTATGACCCATTGTGGGTTTGGGA 1020  
An-1 CAACCATTGATATTGGCTCATCCATCGGTAGGATGCTTTGTGAATCATTGTGGGTTTGGGA 1020  
Ler CAACCATTGATATTGGCTCATCCATCGGTAGGATGCTTTGTGAATCATTGTGGGTTTGGGA 1020  
Est-1\* CAACCATTGATATTGGCTCATCCATCGGTAGGATGCTTTGTGAATCATTGTGGGTTTGGGA 1020  
Est-1 CAACCATTGATATTGGCTCATCCATCGGTAGGCTGCTTTGTGAATCATTGTGGGTTTGGGA 1020  
\*\*\*\*\*

Col-0 TCAATGTGGGAGTCTCTAGTGAGTGATTGTCAAATAGTCTTGCTTCCATATTTGTGTGAT 1080  
Est TCAATGTGGGAGTCTCTAGTGAGTGATTGTCAAATAGTCTTGCTTCCATATTTGTGTGAT 1080  
Kond TCAATGTGGGAGTCTCTAGTGAGTGATTGTCAAATAGTCTTACTTCCATATTTGAGTGAT 1080  
Tsu-1 TCAATGTGGGAGTCTCTAGTGAGTGATTGTCAAATAGTCTTGCTTCCATATTTGAGTGAT 1080  
An-1 TCAATGTGGGAGTCTCTAGTGAGTGATTGTCAAATAGTCTTGCTTCCATATTTGAGTGAT 1080  
Ler TCAATGTGGGAGTCTCTAGTGAGTGATTGTCAAATAGTCTTGCTTCCATATTTGAGTGAT 1080  
Est-1\* TCAATGTGGGAGTCTCTAGTGAGTGATTGTCAAATAGTCTTGCTTCCATATTTGTGTGAT 1080  
Est-1 TCAATGTGGGAGTCTCTAGTGAGTGATTGTCAAATAGTCTTGCTTCCATATTTGAGTGAT 1080  
\*\*\*\*\*

Col-0 CAAATTCTCAACACTAGATTGATGAGTGAGGAACTCGAGGTTTCGGTGGAAGTGAAAAGA 1140  
Est CAAATTCTCAACACTAGATTGATGAGTGAGGAACTCGAGGTTTCGGTGGAAGTGAAAAGA 1140  
Kond CAAATTCTCAACACTAGATTGATGAGTGAGGAACTCGAGGTTTCGGTGGAAGTGAAAAGA 1140  
Tsu-1 CAAATTCTCAACACTAGATTGATGAGTGAGGAACTCGAGGTTTCGGTGGAAGTGAAAAGA 1140  
An-1 CAAATTCTCAACACTAGATTGATGAGTGAGGAACTCGAGGTTTCGGTGGAAGTGAAAAGA 1140  
Ler CAAATTCTCAACACTAGATTGATGAGTGAGGAACTCGAGGTTTCGGTGGAAGTGAAAAGA 1140  
Est-1\* CAAATTCTCAACACTAGATTGATGAGTGAGGAACTCGAGGTTTCGGTGGAAGTGAAAAGA 1140  
Est-1 CAAATTCTCAACACTAGATTGATGAGTGAGGAACTCGAGGTTTCGGTGGAAGTGAAAAGA 1140

\*\*\*\*\*

Col-0 GAAGAAACAGGATGGTTCTCGAAAGAGAGCTTAAGTGTTGCGATCACCTCGGTGATGGAC 1200  
Est GAAGAAACAGGATGGTTCTCGAAAGAGAGCTTAAGTGTTGCGATCACCTCGGTGATGGAC 1200  
Kond GAAGAAACAGGATGGTTCTCGAAAGAGAGCTTAAGTGTTGCGATCACCTCGGTGATGGAC 1200  
Tsu-1 GAAGAAACAGGATGGTTCTCGAAAGAGAGCTTAAGTGTTGCGATCACCTCGGTGATGGAC 1200  
An-1 GAAGAAACAGGATGGTTCTCGAAAGAGAGCTTAAGTGTTGCGATCACCTCGGTGATGGAC 1200  
Ler GAAGAAACAGGATGGTTCTCGAAAGAGAGCTTAAGTGTTGCGATCACCTCGGTGATGGAC 1200  
Est-1\* GAAGAAACAGGATGGTTCTCGAAAGAGAGCTTAAGTGTTGCGATCACCTCGGTGATGGAC 1200  
Est-1 GAAGAAACAGGATGGTTCTCGAAAGAGAGCTTAAGTGTTGCGATCACCTCGGTGATGGAC 1200

\*\*\*\*\*

Col-0 AAAGATAGTGAGTTAGGGAATCTGGTGAGGAGGAACCACGCTAAATTAAGGAGGTTTTG 1260  
Est AAAGATAGTGAGTTAGGGAATCTGGTGAGGAGGAACCACGCTAAATTAAGGAGGTTTTG 1260  
Kond AAAGATAGTGAGTTAGGGAATCTGGTGAGGAGGAACCACGCTAAATTAAGGAGGTTTTG 1260  
Tsu-1 AAAGATAGTGAGTTAGGGAATCTGGTGAGGAGGAACCACGCTAAATTAAGGAGGTTTTG 1260  
An-1 AAAGATAGTGAGTTAGGGAATCTGGTGAGGAGGAACCACGCTAAATTAAGGAGGTTTTG 1260  
Ler AAAGATAGTGAGTTAGGGAATCTGGTGAGGAGGAACCACGCTAAATTAAGGAGGTTTTG 1260  
Est-1\* AAAGATAGTGAGTTAGGGAATCTGGTGAGGAGGAACCACGCTAAATTAAGGAGGTTTTG 1260  
Est-1 AAAGATAGTGAGTTAGGGAATCTGGTGAGGAGGAACCACGCTAAATTAAGGAGGTTTTG 1260

\*\*\*\*\*

```

Col-0      GTTAGTCCTGGATTATTAACCGGTTACACCGATGAATTTGTTGAAACTTTGCAGAATATA 1320
Est        GTTAGTCCTGGATTATTAACCGGTTACACCGATGAATTTGTTGAAACTTTGCAGAATATA 1320
Kond       GTTAGTCCTGGATTATTAACCGGTTACACCGATGAATTTGTTGAAACTTTGCAGAATATA 1320
Tsu-1     GTTAGTCCTGGAATTATTAACCGGTTACACCGATGAATTTGTTGAAACTTTGCAGAATATA 1320
An-1      GTTAGTCCTGGATTATTAACCGGTTACACCGATGAATTTGTTGAAACTTTGCAGAATATA 1320
Ler       GTTAGTCCTGGATTATTAACCGGTTACACCGATGAATTTGTTGAAACTTTGCAGAATATA 1320
Est-1*    GTTAGTCCTGGATTATTAACCGGTTACACCGATGAATTTGTTGAAACTTTGCAGAATATA 1320
Est-1     GTTAGTCCTGGATTATTAACCGGTTACACCGATGAATTTGTTGAAACTTTGCAGAATATA 1320
*****
Col-0      GTCAACGATACAAATCTTGAATGA 1344
Est        GTCAACGATACAAATCTTGAATGA 1344
Kond       GTCAACGATACAAATCTTGAATGA 1344
Tsu-1     GTCAACGATACAAATCTTGAATGA 1344
An-1      GTCAACGATACAAATCTTGAATGA 1344
Ler       GTCAACGATACAAATCTTGAATGA 1344
Est-1*    GTCAACGATACAAATCTTGAATGA 1344
Est-1     GTCAACGATACAAATCTTGAATGA 1344
*****

```

**Figure S3. Multiple Sequence Alignment of coding sequences of *AtUDP-glycosyltransferase* gene produced by CLUSTALW.** The following sequences were taken from the 1001 Genomes Project database ([www.1001genomes.org](http://www.1001genomes.org)): Kond, *Ler*, Est, Col-0, Est-1, Tsu-1, An-1 (Kas-2 sequence was not available in the database). The selected sequences originate from accessions, which were used in the initial screening of natural variation in scopolin and scopoletin accumulation. The Est-1\* sequence was obtained after re-sequencing of Est-1 accession from our laboratory.
